# Supplementary material for: Comparison of regeneration capacity and Agrobacterium-mediated cell transformation efficiency of different cultivars and rootstocks of Vitis spp. via organogenesis
Source: PubMed Central journal article supplement (PMC6345860; doi:10.1038/s41598-018-37335-7), 2019-01-24
Supplement: 41598_2018_37335_MOESM1_ESM.pdf [file 41598_2018_37335_MOESM1_ESM.pdf]

**Comparison of regeneration capacity and *Agrobacterium*-mediated cell transformation efficiency of different cultivars and rootstocks of *Vitis* spp. via organogenesis**

Sabbadini S.<sup>1</sup>, Capriotti L.<sup>2</sup>, Molesini B.<sup>2</sup>, Pandolfini T.<sup>2</sup>, Navacchi O.<sup>3</sup>, Limerà C.<sup>1</sup>, Ricci A.<sup>1</sup>, Mezzetti B.<sup>1\*</sup>

<sup>1</sup>Department of Agricultural, Food and Environmental Sciences, Università Politecnica delle Marche, Ancona, Italy.

<sup>2</sup>Department of Biotechnology, University of Verona, Italy.

<sup>3</sup>Vitroplant International, Cesena, Italy.

\*Email: [b.mezzetti@staff.univpm.it](mailto:b.mezzetti@staff.univpm.it)

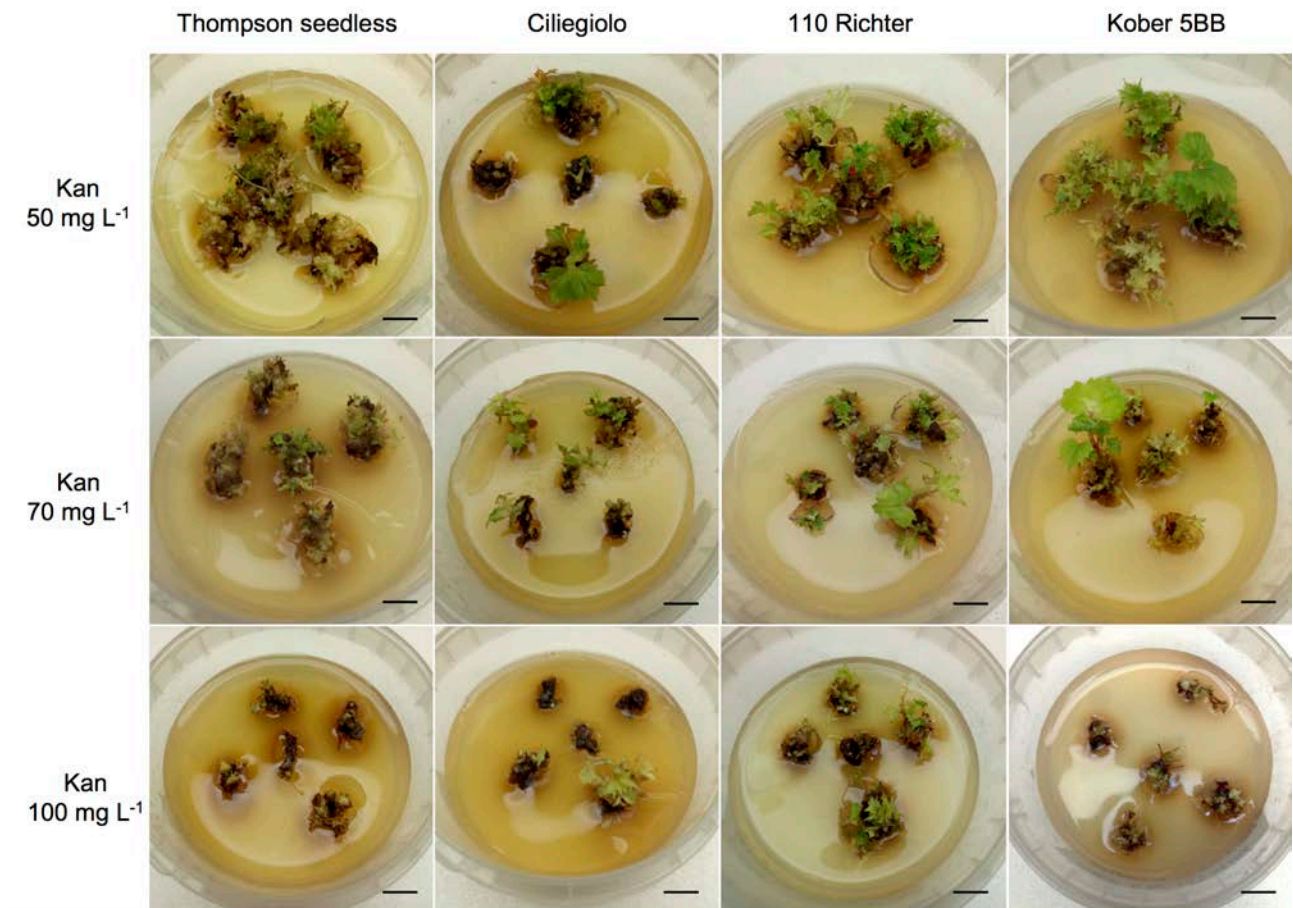

**Supplementary Fig.1** Sensitivity test to kanamycin of non-transformed MB slices of Thompson seedless, Ciliegiolo, 110 Richter and Kober 5BB. A representative combined image after three weeks of culture on IM3 supplemented with increasing kanamycin concentrations (50 mg L<sup>-1</sup>, 70 mg L<sup>-1</sup>, and 100 mg L<sup>-1</sup>).

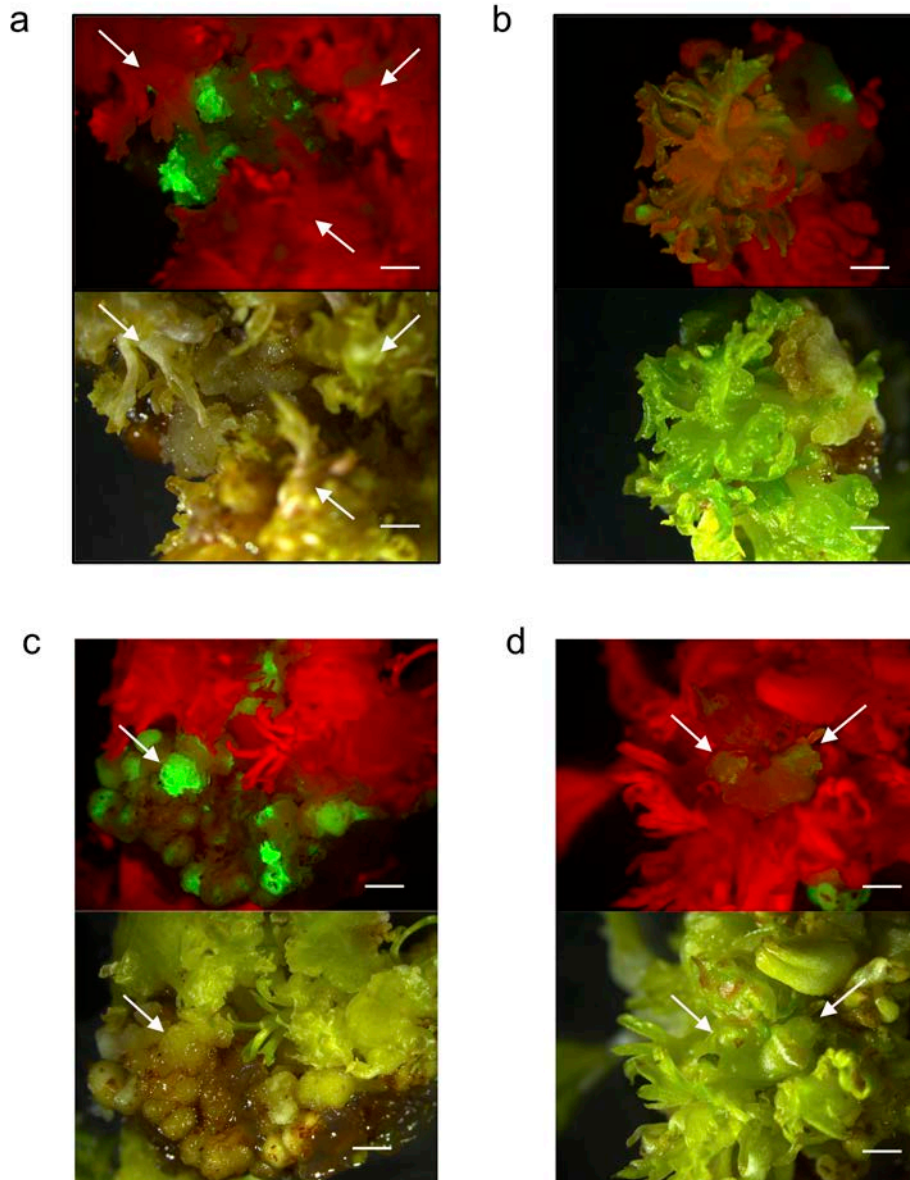

**Supplementary Fig.2** Thompson seedless MB slices. Uniform fluorescence with bright green colour was observed in transformed tissues under UV light: a) regeneration of escapes (non-transformed shoots) close to transgenic cells after 9 weeks of culture at kanamycin 70 mg L<sup>-1</sup>, white arrows indicate groups of regenerating escapes; b) eGFP expressing shoot regenerated after 9 weeks of culture on kanamycin-free medium; c) White arrows indicate a eGFP fluorescent globular callus with no regenerative competence after 3 weeks of culture with kanamycin 70 mg L<sup>-1</sup>; d) eGFP-fluorescent adventitious shoots regenerating after 3 weeks of culture with kanamycin 70 mg L<sup>-1</sup>, white arrows indicate a translucent meristematic cells cluster. Upper and lower panels show images taken under UV and white light, respectively (*bar*= 2mm).

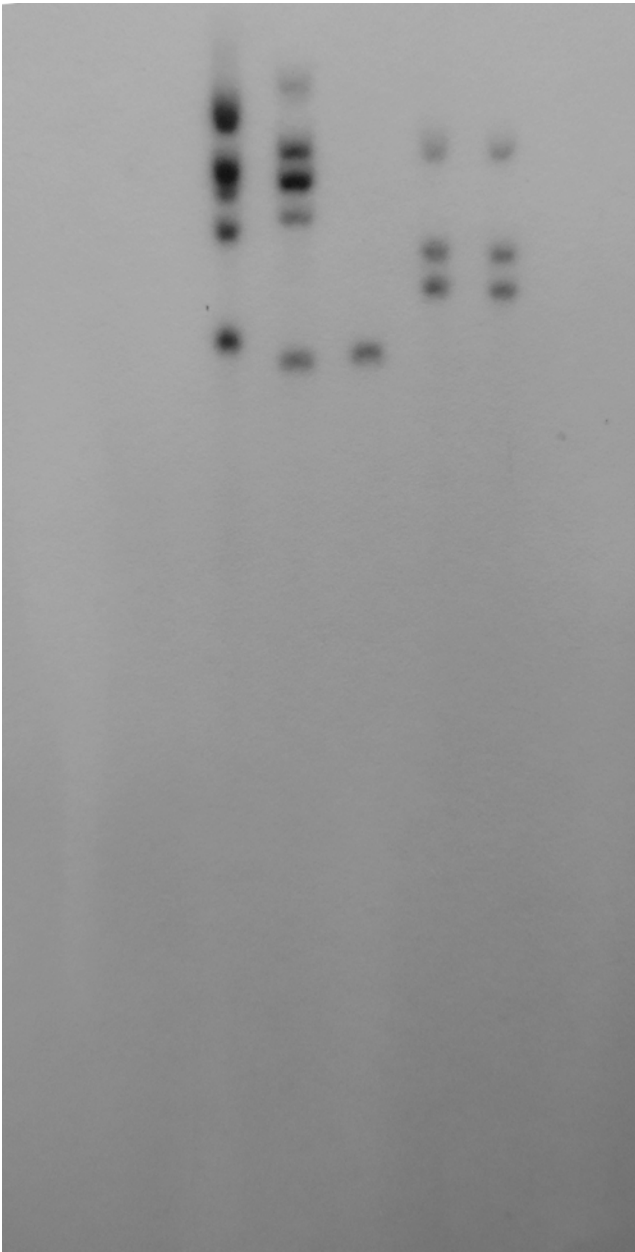

**Supplementary Fig.3** Full-length Southern blot shown in Fig.4 d.
